# Binding of General Anesthetics to Ion Channels

Letícia Stock, Juliana Hosoume, Leonardo Cirqueira and Werner Treptow<sup>#</sup>

Laboratório de Biologia Teórica e Computacional (LBTC), Universidade de Brasília DF, Brasil

**Author contributions:** WT designed research; LS, JH and LC performed research; LS, JH, LC and WT analyzed data; WT wrote the paper.

**#Corresponding author:** E-mail [treptow@unb.br](mailto:treptow@unb.br)

**ABSTRACT:** The direct-site hypothesis assumes general anesthetics bind ion channels to impact protein equilibrium and function, inducing anesthesia. Despite advancements in the field, a first-principle all-atom demonstration of this structure-function premise misses. We focus on the clinically used sevoflurane interaction to anesthetic-sensitive Kv1.2 mammalian channel to resolve if sevoflurane binds protein's well-characterized open and closed structures in a conformation-dependent manner to shift channel equilibrium. We employ an innovative approach relying on extensive docking calculations and free-energy perturbation and find sevoflurane binds open and closed structures at multiple sites under complex saturation and concentration effects. Results point to a non-trivial interplay of conformation-dependent modes of action involving distinct binding sites that increase channel open-probability at diluted ligand concentrations. Given the challenge in exploring more complex processes potentially impacting channel-anesthetic interaction, the result is reassuring as demonstrates the process of multiple binding events alone may account for open-probability shifts recorded in measurements.

**KEYWORDS:** general anesthetics | ion channels | binding free energy | protein equilibrium

## Introduction

Volatile and injected general anesthetics encompass a diverse array of small and uncharged chemotypes including haloalkanes, haloethers and alkylphenols. Despite efforts reaching back over a century, clarification of their microscopic mechanism in general anesthesia has proven difficult and wanting. A favored hypothesis proposes that ion channels in the brain are implicated, among which members of ionotropic neurotransmitter receptors, voltage-gated and non-gated ion channels are best-known players (Covarrubias et al., 2015; Franks, 2008; Franks and Honoré, 2004). Primary exemplars are the Cys-loop nicotinic acetylcholine and  $\gamma$ -aminobutyric acid class A receptors, the voltage-gated sodium and potassium channels, and the tandem pore potassium channels. An extensive series of electrophysiological studies corroborate the hypothesis by demonstrating inhibition to potentiation effects of general anesthetics on the various receptor targets. Beyond these electrophysiological studies of reductionist systems, the current view has gained additional support from gene knockout experiments demonstrating for some of these channels the *in vivo* role on a clinically-relevant anesthetic outcome. For instance, the knockout of the non-gated tandem pore potassium channel *trek-1* produces an animal model (*Trek1<sup>-/-</sup>*) resistant to anesthesia by inhalational anesthetics (Heurteaux et al., 2004).

How general anesthetics modulate ion channels to account for endpoints of anesthesia must at some point build on understanding electrophysiological data in the context of ligand binding, a reasoning that has driven mounting efforts in the field. Currently, though not refuting other molecular processes likely contributing for anesthetic action (Cantor, 1997; Finol-Urdaneta et al., 2010; Roth et al., 2008), crystallography and manifold studies involving molecular dynamics support that anesthetics bind ion channels at clinical concentrations (Arcario et al., 2017; Barber et al., 2011, 2014a; Brannigan et al., 2010; Jayakar et al., 2013; Kinde et al., 2016; LeBard et al., 2012; Nury et al., 2011; Raju et al., 2013). Binding interactions have been evidenced in anesthetic containing systems of *mammalian* voltage- and ligand-gated channels, and *bacterial* channel analogs as well. Specifically, partitioning of anesthetics in the membrane core allows accessibility-to and binding-to multiple transmembrane (TM) protein sites featuring single or multiple occupancy states - a process that might depend further on chemotypes, channel-types and conformations. Although some progress has been made in one or more aspects of the current view, a first-principle demonstration that anesthetics bind ion channels to affect protein equilibrium and function as recorded in experiments still misses.

Here, we focus our efforts on the haloether sevoflurane and its molecular interaction to Kv1.2, a mammalian voltage-gated potassium channel. Experimental work supports that sevoflurane potentiates the channel in a dose-dependent manner (Annika F. Barber et al., 2012; Liang et al., 2015). Effects on current tracings include a leftward shift in the conductance-voltage relationship of the channel and an increased maximum conductance. Among all other aspects that might impact channel-anesthetic interactions in general, we are specifically interested in determining if sevoflurane binds the well-characterized open-conductive (**O**) and resting-closed (**C**) structures of Kv1.2 (Long et al., 2005; Stock et al., 2013) in a conformation-dependent manner to impact protein equilibrium. Very recently, we went through an innovative structure-based study (Stock et al., 2017) of concentration-dependent binding of small ligands to multiple saturable sites in proteins to show that sevoflurane binds the open-pore structure of Kv1.2 at the S4S5 linker and the S6P-helix interface - a result largely supported by independent photolabeling experiments (Bu et al., 2017; Woll et al., 2017). Here, we aim at extending these previous calculations to investigate sevoflurane interactions with the entire TM-domain of the channel and more importantly, to resolve any conformational dependence for its binding process to channel structures. Accordingly, in the following sections, we first provide the theoretical framework to study binding of sevoflurane to a fixed conformation of the channel under equilibrium conditions. A state-dependent strategy is put forward to describe anesthetic binding in terms of occupancy states of the channel that embodies multiple saturable sites and concentration effects. The strategy is then generalized to account for ligand effects on the **C-O** equilibrium, allowing for reconstruction of voltage-dependent open probabilities of the channel at various ligand concentrations. Anticipating our results, we find that sevoflurane binds Kv1.2 structures at multiple sites under saturation and concentration effects. Despite a similar pattern of molecular interactions, binding of sevoflurane is primarily driven towards the

64 open-conductive state shifting leftward the open probability of the channel at diluted ligand concentrations.

65

## 66 Theory

67 **Anesthetic Binding and Channel Energetics.** Consider the voltage-gated channel embedded in a *large* membrane-aqueous volume  
68 that contains  $N$  ligand molecules under dilution. The protein is assumed to remain in a well-defined conformational state  $X$   
69 providing with  $s$  distinct binding sites for ligands. For simplicity, we consider that ligands dissolve uniformly across the membrane-  
70 aqueous region of the system from where they can partition into the protein sites. The lipid and aqueous phases thus provide with a  
71 bulk volume  $V$  occupied by ligands at constant density  $\bar{\rho}$  and *excess* chemical potential  $\bar{\mu}$ . We consider further that every site  
72  $j=1, \dots, s$  corresponds to a discrete volume  $\delta V_j$  that can be populated by  $0 \leq n_j \leq n_j^{\max}$  ligands. We denote by  $O_X^*(n_1, \dots, n_s)$  the  
73 specific occupancy state featuring  $n_j$  bound ligands at corresponding sites and by  $n=n_1+\dots+n_s$  the total number of bound ligands  
74 in this state.

75 Under these considerations, solution of ligand binding to multiple receptor sites relies fundamentally in determining the equilibrium  
76 constant  $K_X(n_1, \dots, n_s)$  for the process  $O_X^*(0_1, \dots, 0_s) + nL \rightleftharpoons O_X^*(n_1, \dots, n_s)$  where,  $O_X^*(0_1, \dots, 0_s)$  is the empty receptor state with all  
77 ligands occupying the bulk. As shown in previous work (Stock et al., 2017),  $K_X(n_1, \dots, n_s)$  can be evaluated from MD-based free-  
78 energy perturbation (FEP) calculations

$$K_X(n_1, \dots, n_s) = \frac{1}{n_1! \dots n_s!} \left[ \prod_{i=1}^n \left( \frac{2\pi}{\beta k_i} \right)^{\frac{3}{2}} \right] e^{-\beta[W_X^*(n) - n\bar{\mu}]} \quad (1)$$

79 in which  $\bar{\mu}$  is the solvation free energy of the ligand in the bulk and  $W_X^*(n)$  corresponds to the free-energy of  $n$  site-specific  
80 bound ligands relative to a gas phase state given that ligands  $i=1, \dots, n$  are restrained to occupy an *effective* site volume

81  $\left[ \prod_{i=1}^n \left( \frac{2\pi}{\beta k_i} \right)^{\frac{3}{2}} \right]$  at structure  $X$ . Eq. [1] is solved for the thermodynamic limit  $N \gg n$  and  $\frac{1}{n_1! \dots n_s!}$  corrects the binding constant for  
82 equivalent configurations of  $n_j$  indistinguishable ligands within the site volumes  $\delta V_j$ . Within this formulation, knowledge of  
83  $K_X(n_1, \dots, n_s)$  ensures the probability of any occupancy state

$$\rho_X(n_1, \dots, n_s) = \frac{\bar{\rho}^{(n_1+\dots+n_s)} K_X(n_1, \dots, n_s)}{\sum_{n_1, \dots, n_s} \bar{\rho}^{(n_1+\dots+n_s)} K_X(n_1, \dots, n_s)} \quad (2)$$

84 to be known in practice from free-energy calculations (Chipot and Pohorille, 2007). Note in eq. [2],  $\rho_X(n_1, \dots, n_s)$  depends on the  
85 number density or concentration of the ligand at the reservoir thus providing us with a useful equation for investigation of  
86 concentration effects.

87 To investigate any conformational dependence on ligand binding, we consider eq. [2] in the context of conformational equilibrium of  
88 the channel over a range of TM voltages. Specifically, we consider the very same microscopic system submitted to a Nernst potential  
89 induced by non-symmetrical electrolytes between membrane faces. The capacitive nature of the channel-membrane system ensures  
90 the Nernst potential to account for a voltage difference  $V$  across the lipid bilayer. Accordingly, by denoting as  $\mathbf{r}^P$  the entire set of  
91 Cartesian coordinates of the channel, the free energy of the protein  $F_X(V)$  in the particular conformation  $X \equiv \mathbf{X}(\mathbf{r}^P)$

$$e^{-\beta F_X(V)} \propto \int d\mathbf{r}^P \delta[\mathbf{X}'(\mathbf{r}^P) - \mathbf{X}] e^{-\beta[U(\mathbf{r}^P) + Q(\mathbf{r}^P)V]} \quad (3)$$

92 can be written within an arbitrary constant, in terms of an effective potential energy of the protein  $U(\mathbf{r}^P) + Q(\mathbf{r}^P)V$  when coupled to  
93 the external voltage  $V$  with charge  $Q(\mathbf{r}^P)$  (Roux, 2008). From eq. [3], the open probability of the channel then reduces to

$$\rho_O(V) = \frac{e^{-\beta F_O(V)}}{e^{-\beta F_C(V)} + e^{-\beta F_O(V)}} \quad (4)$$

94 for the case of a voltage-gated channel with two conformational states  $X \equiv \{C, O\}$  connected by the reaction process  $C \xrightleftharpoons{V} O$ . In  
95 terms of *chemical* free-energies of the receptor  $F_C(V=0)$  and  $F_O(V=0)$  and the corresponding *excess* free-energies  $\Delta F_C(V)$   
96 and  $\Delta F_O(V)$ , eq. [4] simplifies into the familiar two-state Boltzmann equation

$$\rho_O(V) = [1 + e^{+\beta \Delta Q[V_m - V]}]^{-1} \quad (5)$$

97 in which,

$$\Delta Q = -\frac{\Delta F_O(V) - \Delta F_C(V)}{V} \quad (6)$$

98 is the gating charge  $\Delta Q = Q_O - Q_C$  resulting from differences in the effective protein charge in each conformational state and

$$V_m = \frac{[F_O(V=0) - F_C(V=0)]}{\Delta Q} \quad (7)$$

99 is the midpoint voltage in which  $\rho_C(V) = \rho_O(V)$  (Roux, 2008). From eq. [5], the equilibrium constant between protein states  $C$   
100 and  $O$  then writes as

$$K(V) = e^{-\beta \Delta Q[V_m - V]}$$

101 with  $K(0) = e^{-\beta V_m \Delta Q}$  determining their equilibrium at 0 mV. In eq. [6 and 7], the voltage-independent free energies account for the  
102 microscopic potential energy of the channel and its solvation energy in each state whereas the corresponding voltage-dependent  
103 *excess* free energies are proportional to the applied voltage and associated protein charges.

104 By combining eq. [2 and 5] through a generalized thermodynamic-cycle analysis dealing with all possible states of the ligand-free

105 and ligand-bound receptor, binding effects on the channel energetics can be then explicitly expressed over a range of membrane  
106 voltages

$$\rho_o(V) = \frac{K(V)Z_o(n_1, \dots, n_s)}{Z_c(n_1, \dots, n_s) + K(V)Z_o(n_1, \dots, n_s)} \quad (8)$$

107 in terms of the partition functions

$$\begin{cases} Z_c(n_1, \dots, n_s) = \sum_{n'_1, \dots, n'_s} \bar{\rho}^{(n'_1 + \dots + n'_s)} K_c(n'_1, \dots, n'_s) \\ Z_o(n_1, \dots, n_s) = \sum_{n'_1, \dots, n'_s} \bar{\rho}^{(n'_1 + \dots + n'_s)} K_o(n'_1, \dots, n'_s) \end{cases}$$

108 for the ensemble of occupancy states in each of the protein conformations. Eq. [8] simplifies into

$$\rho_o(V) = \left[ 1 + \frac{Z_c(n_1, \dots, n_s)}{Z_o(n_1, \dots, n_s)} e^{+\beta \Delta Q[V_m - V]} \right]^{-1} \quad (9)$$

109 the two-state Boltzmann equation embodying now the free-energy contributions arising from ligand binding. Note that eq. [8] is  
110 achieved by rewriting the state probability densities

$$\begin{cases} \rho_c(V) = \sum_{n'_1, \dots, n'_s} \rho_c(n'_1, \dots, n'_s, V) \\ \rho_o(V) = \sum_{n'_1, \dots, n'_s} \rho_o(n'_1, \dots, n'_s, V) \end{cases}$$

111 in terms of the reference state  $\rho_c(0_1, \dots, 0_s, V)$ .

112 In the following, we consider eq. [1, 5 and 9] to investigate the molecular binding of sevoflurane to open and closed structures of  
113 Kv1.2, and its functional impact on the channel energetics.

114

## 115 Results and Discussion

116 **Binding of Anesthetics to Multiple Channel Sites.** We applied large-scale and flexible docking calculations to solve sevoflurane  
117 interactions to Kv1.2 structures  $X \equiv \{C, O\}$  (Fig. 1). A total of ~ 6,000 docking solutions was generated per channel conformation  
118 and clustered into 21 ligand interaction sites. The interaction sites spread over the transmembrane region of the channel at the S4S5  
119 linker, S6P-helix interface and at the extracellular face, next to the selectivity filter. Further docking sites were resolved within the  
120 voltage-sensor, at the S4Pore interface and at the central-cavity of the channel. Re-docking of sevoflurane generated in turn a total of  
121 ~ 13,000 solutions per channel conformation, solving the interaction of two ligands for all sites but the extracellular face.

122 From the docking ensembles, there is up to  $2 \times 3^{21}$  occupancy states of the channel structures that might contribute for sevoflurane  
123 binding and functional effects. To evaluate this quantitatively, we performed an extensive series of FEP calculations to estimate the  
124 per-site binding affinity for one- and two-bound ligands against the channel structures (Fig. S1, Table-S1 and S2). Binding constants  
125 for the individual sites are heterogeneous and take place under a diverse range, *i.e.*  $10^{-8}$  (mM<sup>-1</sup>) -  $10^{+2}$  (mM<sup>-2</sup>). There is however a  
126 decreasing trend of affinities involving sites respectively at the S4S5 linker, S4Pore and S6P-helix interfaces, voltage sensor, central  
127 cavity and extracellular face.

128 To determine if sevoflurane binds channel structures  $X \equiv \{C, O\}$  at clinically relevant concentrations, we computed binding  
129 probabilities  $\rho_x(n_1, \dots, n_s)$  for dilute concentrations of the ligand in solution, *i.e.* 1mM, 10mM and 100mM. Equilibrium constants  
130  $K_x(n_1, \dots, n_s)$  for every occupancy state of the channel were then reconstructed from the per-site affinities to determine state  
131 probabilities via eq. [2]. Here, estimates of  $K_x(n_1, \dots, n_s)$  were determined for the condition of independent binding sites as  
132 minimum site-to-site distances of ~15 Å demonstrated their non-overlap distributions in each of the channel structures. At low 1mM  
133 concentration,  $\rho_x(n_1, \dots, n_s)$  are largely dominated by the probability of the empty state  $\rho_x(0_1, \dots, 0_s)$  implying only a small  
134 fraction of bound states with non-negligible occurrences (Fig. S2). Within this fraction, the most likely states involve single  
135 occupancy of the S4S5 linker or the S4Pore interface as shown by the marginal probabilities  $\rho_x(n_j)$  at the individual sites (Fig. 2).  
136 At higher concentrations, there is a clear shift of  $\rho_x(n_1, \dots, n_s)$  towards states of the channel that enhances significantly the average  
137 number of bound ligands. Careful inspection of  $\rho_x(n_j)$  confirms the major relevance of sites at the S4S5 linker and S4Pore interface  
138 over the entire concentration range, accompanied by an increasing importance of binding regions at the S6P-helix interface. In  
139 contrast,  $\rho_x(n_j)$  for sites within the voltage-sensor, at the central cavity and nearby the extracellular face of the channel remains  
140 negligible over all concentrations. For completeness, note in Table-S1 that equilibrium constants for doubly-occupied sites are  
141 comparable to or even higher than estimates for one-bound molecule thus revealing important saturation effects in which one or two  
142 sevoflurane molecules can stably bind the channel structures at individual sites. The result is especially true for spots at the S4S5  
143 linker and S4Pore interface.

144

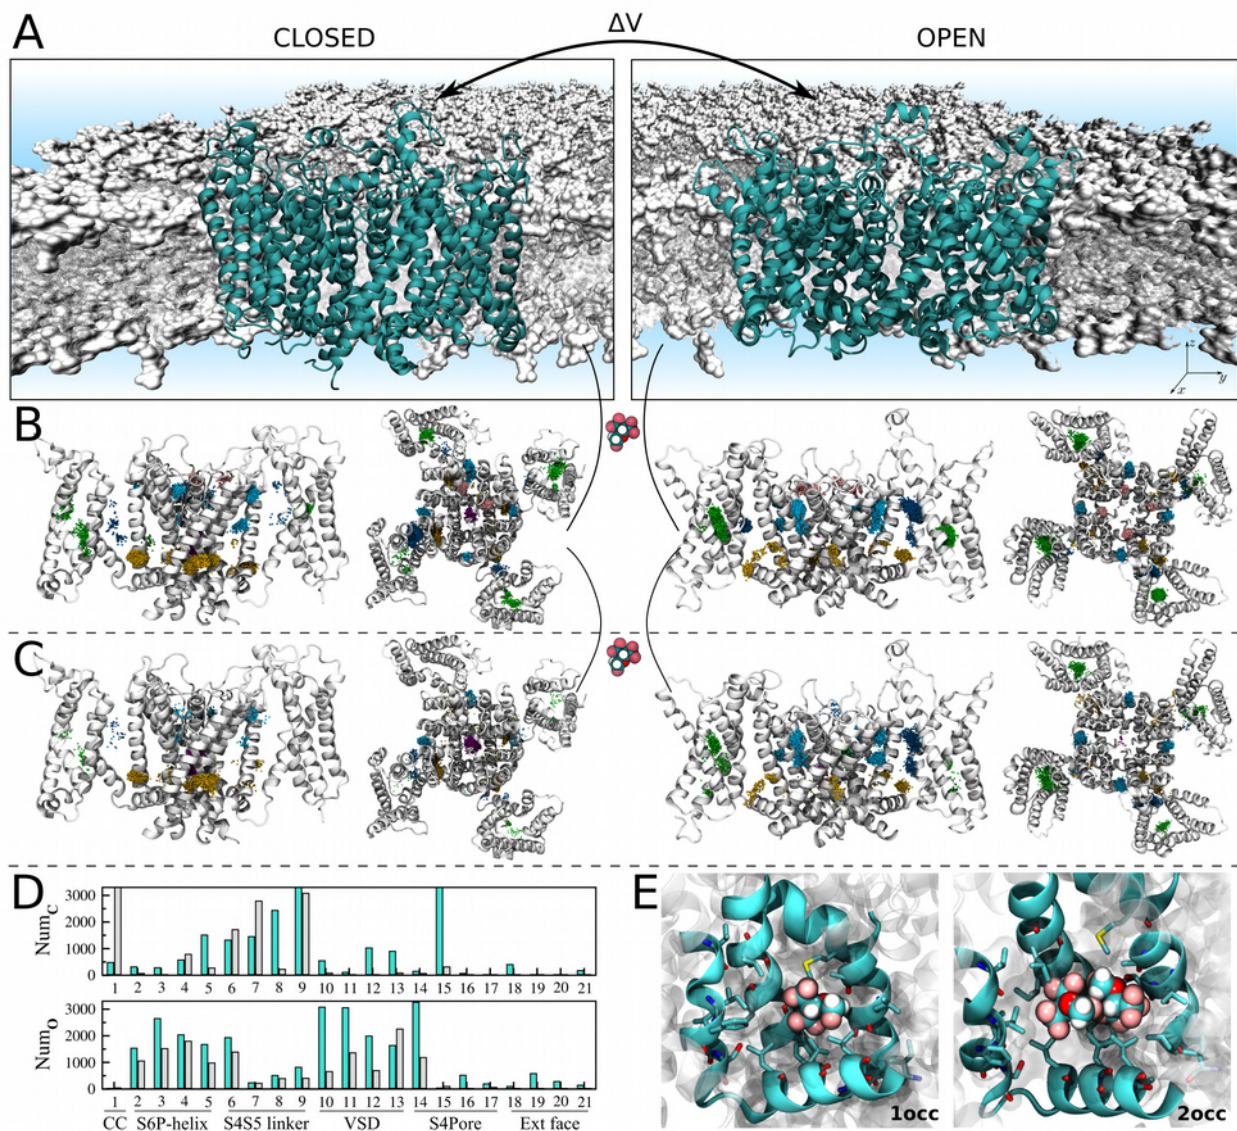

145 **Fig. 1.** Resolution of sevoflurane sites at the homotetrameric Kv1.2 structures **C** and **O**. (A) Atomistic systems containing Kv1.2 structures  
 146 (cyan) embedded in a fully-hydrated lipid bilayer (gray) were MD simulated to produce molecular ensembles considered for flexible docking  
 147 calculations. (B) Docking solutions for singly-occupied sites. Shown is the ensemble-average channel structures **C** and **O**, along with the set  
 148 of centroid configurations of sevoflurane (points) determined from docking. Centroid configurations of sevoflurane were clustered as a  
 149 function of their location on the channel structures that is, within the voltage-sensor (green), at the S4S5 linker (yellow), at the S4Pore (dark  
 150 blue) and S5P-helix (light blue) interfaces, at the central cavity (violet) and extracellular face (pink). Each of these clusters was treated as an  
 151 interaction site  $j$  for sevoflurane with volume  $\Delta V_j$ . (C) Following another round of docking calculations started from structures in (B),  
 152 solutions for doubly-occupied sites were resolved by determining if volumes  $\Delta V_j$  accommodate the centroid positions of two docked  
 153 ligands at once. (D) Per site number of docking solutions for single (cyan) and double (gray) ligand occupancy. (E) Representative molecular  
 154 structure resolved from docking. Voltage-sensor domains in two opposing channel subunits are not shown for clarity in (B) and (C) lateral  
 155 views.

156 The complex distributions of the multiple occupied states of structures  $X \equiv \{C, O\}$  were described in three dimensions by mapping  
 157  $\rho_X(n_1, \dots, n_s)$  into the position-dependent density  $\rho_X^j(\mathbf{R})$  of sevoflurane in each binding site  $j$  (cf. eq. 18 And 20). As shown in  
 158 Fig. 3 and supplementary Movies S1 and S2, the density of sevoflurane makes sense of the results by showing the concentration  
 159 dependent population of bound ligands. Projection of  $\rho_X^j(\mathbf{R})$  along the transmembrane direction  $z$  of the system,  $\rho_X^j(z)$ , stresses  
 160 further the results (cf. eq. 20). Note from  $\rho_X^j(\mathbf{R})$  that sevoflurane binds channel structures in a concentration dependent manner,  
 161 binding preferentially the S4S5 linker and the interfaces S4Pore and S6P-helix over a range of concentrations.

162 So far, our calculations demonstrate that sevoflurane binds Kv1.2 structures over a range of concentrations, preferentially at the  
 163 linker S4S5 and at the segment interfaces S4Pore and S6P-helix. From a physical-chemical point of view, spots at these channel  
 164 regions are primarily dehydrated lipid-accessible amphiphilic pockets providing with favorable interaction sites for the polar  
 165 lipophilic sevoflurane molecule (Fig. S3). It is worth mentioning that these findings recapitulate recent photolabeling experiments  
 166 demonstrating that photoactive analogs of sevoflurane do interact at the S4S5 linker and at the S6P-helix interface of the open-  
 167 conductive Kv1.2 channel (Bu et al., 2017; Woll et al., 2017). In detail, Leu317 and Thr384 were found to be protected from  
 168 photoactive analogs, with the former being more protected though. As shown in Fig. S4, atomic distances of bound sevoflurane to  
 169 these amino-acid side chains are found here to be respectively  $7.28 \pm 2.5 \text{ \AA}$  and  $10.44 \pm 3.66 \text{ \AA}$ , in average more or less standard

170 deviation. Such intermolecular distances are consistent with direct molecular interactions and therefore consistent with the measured  
 171 protective reactions - similar conclusions hold for the closed channel as well. Besides that, our calculations also recapitulate the  
 172 stronger protection of Leu317 in the sense that relative to sites at S6P-helix, the affinity of sevoflurane is found to be higher at the  
 173 S4S5 linker given its stable occupancy by one or two ligands. The stable occupancy of the linker by one or two ligands as computed  
 174 here, is consistent with recent flooding-MD simulations of the homologous sodium channel NaChBac (Annika F Barber et al., 2012;  
 175 Barber et al., 2014a) and more importantly, with previous Ala/Val-scanning mutagenesis showing a significant impact of S4S5  
 176 mutations on the effect of general anesthetics on family members of  $K^+$  channels (Barber et al., 2011). In special, a single residue  
 177 (Gly329) at a critical pivot point between the S4S5 linker and the S5 segment underlines potentiation of Kv1.2 by sevoflurane (Liang  
 178 et al., 2015). Sevoflurane is close to that amino acid when bound at the S4S5 linker.

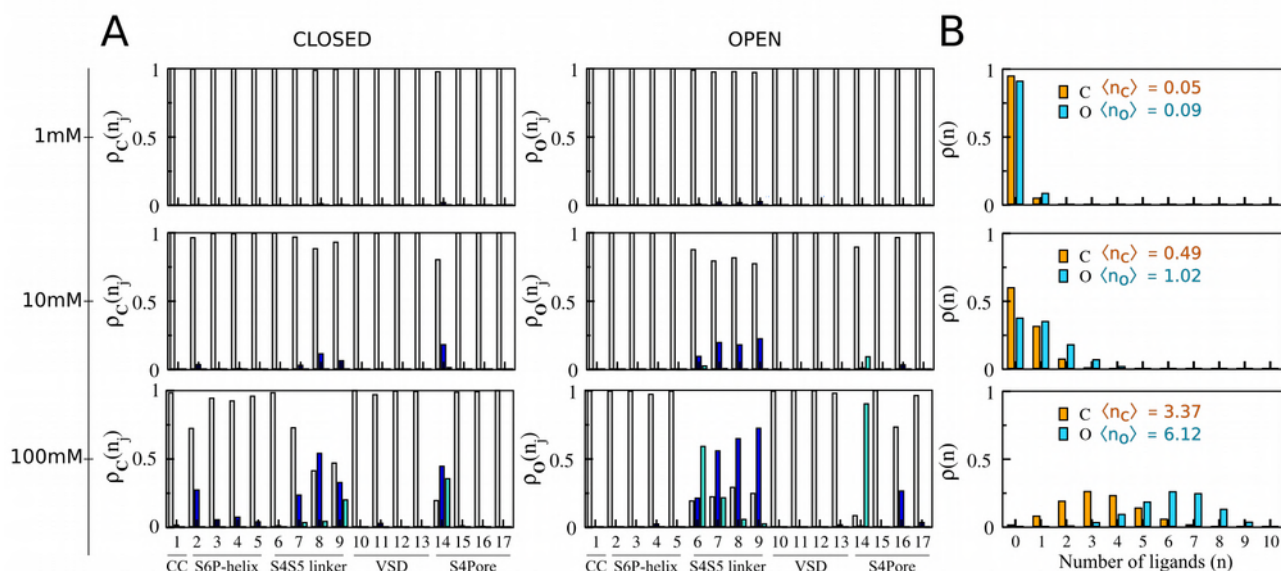

179 **Fig. 2. C and O state-dependent binding probabilities for different concentrations of sevoflurane at the reservoir.** (A) Marginal probabilities  
 180  $\rho_x(n_j)$  of site  $j$ , for  $n_j=0$  (gray),  $n_j=1$  (blue) and  $n_j=2$  (cyan). Marginals at the extracellular face of the channel are negligible for  
 181 every structure/concentration and are not shown for clarity. (B) Probabilities  $\rho_x(n)$  for macrostates  $O_x^*(n)$  mapping an ensemble of  
 182 accessible states  $O_x^*(n_1, \dots, n_s)$  in which  $n$  ligands bind the receptor regardless their specific distributions over the binding sites. Here,  
 183  $\rho_x(n_j)$  and  $\rho_x(n)$  were computed by coarse-graining over state probabilities in Fig. S2 according to eq. [19 and 21], respectively. Average  
 184 number  $\langle n_x \rangle$  of bound ligands as a function of the reservoir concentration is indicated in (B).

185 In contrast to the aforesaid spots, sites within the voltage-sensor, at the main pore and nearby the extracellular face of the Kv1.2  
 186 structures are primarily hydrated lipid-inaccessible amphiphilic pockets that weaken sevoflurane interaction as reflected in the state-  
 187 and space-dependent densities shown in Fig. 2 and 3. The binding probabilities at these sites thus support that the non-negligible  
 188 fraction of poses determined from docking (Fig. 1D) corresponds to low affinity or false positives. In particular, because sevoflurane  
 189 induces potentiation rather than blocking of Kv1.2 (Annika F. Barber et al., 2012; Liang et al., 2015), we read the negligible or  
 190 absent density of the ligand at the central-cavity of the channel as a self-consistent result of the study - especially for the open-  
 191 conductive state. Supporting that conclusion, note that binding constants as computed here are upper bounds for the affinity of  
 192 sevoflurane under the ionic flux conditions in which potentiation takes place. Accordingly, as shown in Fig. S5, the binding affinity  
 193 of a potassium ion at the central cavity overcomes that of sevoflurane due its binding and excess free-energies under applied  
 194 voltages. Once bound, the ion destabilizes sevoflurane interactions and the molecule is not expected to bind the channel cavity at low  
 195 concentration. As also shown in Fig. S5 supplementary Movie S3, even under the occurrence of rare binding events, sevoflurane  
 196 appears unable to block the instantaneous conduction of potassium which is also consistent with its potentiating action.

197 Weak interactions at the main pore and nearby the selectivity filter of Kv1.2 contrasts with sevoflurane binding at analogous regions  
 198 of NaChBac (Annika F Barber et al., 2012; Barber et al., 2014a) due major structural differences between  $Na^+$  and  $K^+$  channels.  
 199 Specifically, the pore of potassium channels lacks lipid-accessible open-fenestrations of the sodium relatives and  $K^+$ -selective filters  
 200 are sharply distinct from  $Na^+$ -selective ones.

201 **Anesthetic Binding Impacts Channel Energetics.** Despite a comparable pattern of molecular interactions, careful inspection of  
 202  $\rho_x(n_j)$  or  $\rho_x^j(\mathbf{R})$  reveals for most sites, an obvious differential affinity of sevoflurane across Kv1.2 structures (Fig. 2 and 3). The  
 203 overall consequence for sevoflurane binding is then clear: the average number of bound ligands to the open-conductive channel  
 204 exceeds systematically that number for the resting-closed channel over the entire concentration range. There is therefore a  
 205 remarkable conformational dependence for the anesthetic interaction, with sevoflurane binding preferentially the open-conductive  
 206 structure.

207 Implications for Kv1.2 energetics were then investigated by quantifying modifications of the open probability  $\rho_o(V)$  of the channel  
 208 induced by sevoflurane at concentrations of 1mM – 100mM (Fig. 4). Specifically, from the partition functions  $Z_C(n_1, \dots, n_s)$  and  
 209  $Z_O(n_1, \dots, n_s)$  across the entire ensemble of occupancy states of the channel, solution of eq. [5 and 9] shows that sevoflurane shifts  
 210 leftward the open probability of Kv1.2 in a concentration-dependent manner - voltage shifts amount from -1.0 mV to -30.0 mV with  
 211 concentration increase of the ligand in solution. For a fixed ligand concentration (100 mM), decomposition analysis reveals further  
 212 that ratio values for the partition functions at individual sites  $j$  can be smaller, equal or larger than unity, implying a non-trivial  
 213 interplay of conformation-dependent modes of action involving distinct sites (*cf.* eq. [23 and 24]). In detail, binding of sevoflurane at

214 the low affinity sites within the voltage-sensor, central cavity and next the extracellular face of the channel are mostly conformation  
 215 independent and do not impact open probability (ratio  $\approx 1$ ). On the other hand, conformation-dependent binding of sevoflurane to  
 216 sites at the S4S5 linker and the S4Pore interface accounts for the overall stabilization of the open channel (ratio  $< 1$ ). That effect  
 217 contrasts with the mild stabilization of the closed conformation of Kv1.2 induced by binding of sevoflurane at S6P-helix and  
 218 reflected in rightward shifts of  $\rho_o(V)$  (ratio  $> 1$ ). The overall conformation-dependent binding process is therefore encoded  
 219 differentially across distinct channel regions.

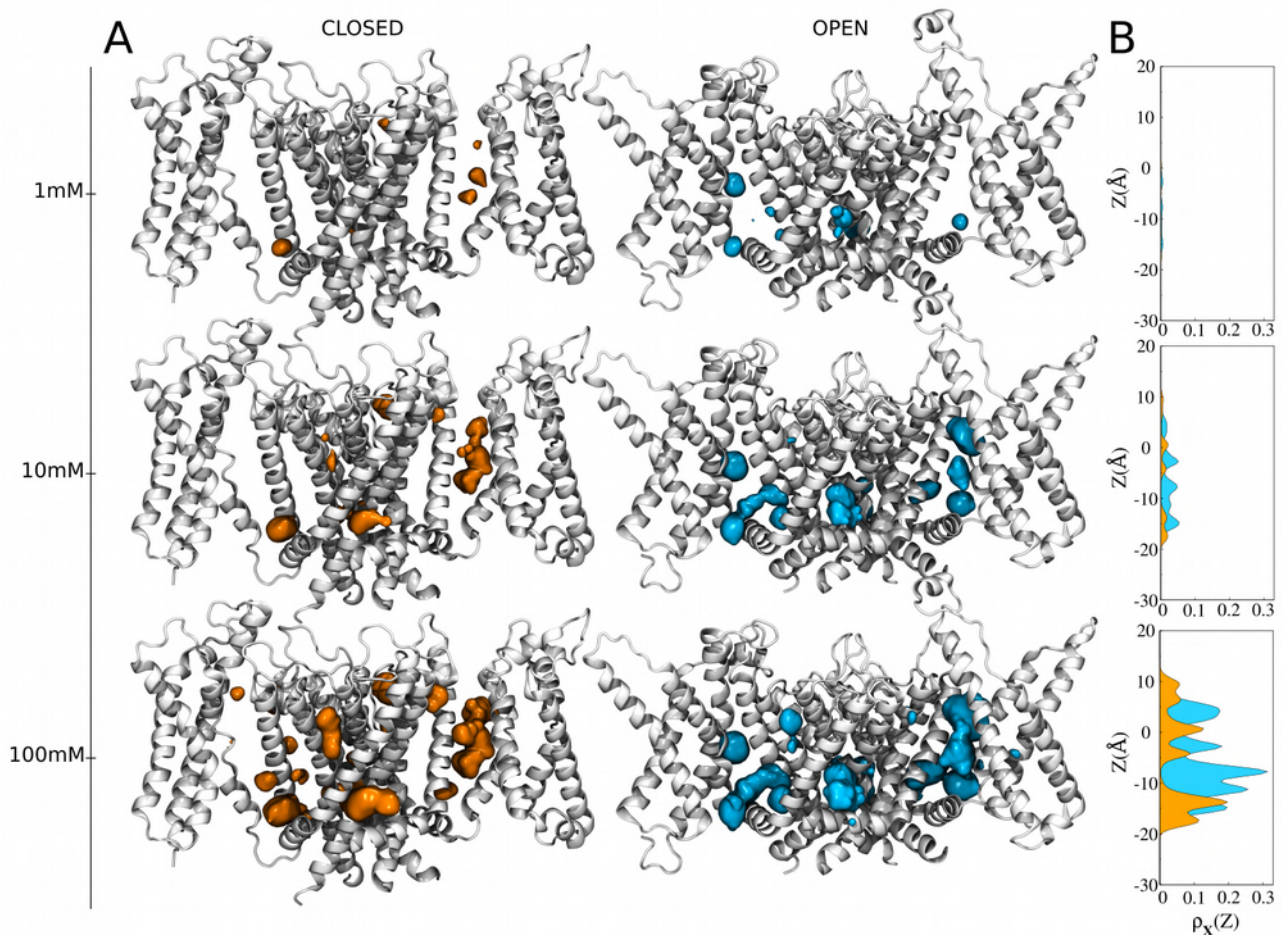

220 **Fig. 3. C and O position-dependent binding probabilities for diluted concentrations of sevoflurane in the bulk.** (A) Shown is the ensemble  
 221 average structure of the channel (white) along with the density  $\rho_x^j(\mathbf{R})$  of sevoflurane (orange and cyan) in each of the binding sites  
 222 (isovalues of  $9 \times 10^{-5} \text{ \AA}^{-3}$ ). As presented in eq. [18], this involved reweighing the marginal probability  $\rho_x(n_j)$  at the binding site  $j$  by the  
 223 local equilibrium density of sevoflurane  $\rho_x(\mathbf{R}|n_j)$ . The marginal  $\rho_x(n_j)$  was computed from eq. [19] by coarse-graining over state  
 224 probabilities in Fig. S2 whereas,  $\rho_x(\mathbf{R}|n_j)$  was calculated from the centroid distributions of docking solutions shown in Fig. 1B and 1C. (B)  
 225 Projection of  $\rho_x^j(\mathbf{R})$  along the transmembrane direction  $z$  of the system,  $\rho_x^j(z)$ . Projections were determined as prescribed in eq. [20].

226 Potentiation of Kv1.2 by sevoflurane has been attributed to stabilization of the open-conductive state of the channel (Liang et al.,  
 227 2015). Given the critical role of S4 and S4S5 linker on the gating mechanism of the channel (Long et al., 2005), it is likely that  
 228 sevoflurane interactions with these segments as found here are at the origins of the experimentally measured voltage-dependent  
 229 component of anesthetic action. While restricted to sevoflurane interactions with the resting-closed and open-conductive structures,  
 230 the presented two-state binding model only embodies left- or rightward shifts in the open probability of the channel and therefore, it  
 231 cannot clarify any molecular process accounting for maximum conductance increase as experimentally recorded and shown in Fig.  
 232 4A. As supported by a recent kinetic modeling study (Annika F. Barber et al., 2012), generalization of eq. [9] to include a third non-  
 233 conducting open state yet structurally unknown is needed to account for such conductance effects. We then speculate that binding of  
 234 sevoflurane at the S4Pore and S6P-helix interfaces might interfere allosterically with the pore domain operation thus affecting  
 235 channel's maximum conductance. A working hypothesis also raised in the context of anesthetic action on bacterial sodium channels  
 236 (Barber et al., 2014a; Raju et al., 2013), assume indeed that non-conducting states of the selectivity filter are implicated.  
 237 Corroboration of a such assumption from a molecular perspective is however not trivial and will necessarily involve further structural  
 238 studies to demonstrate how ligand binding might impact non-conducting open states of the channel to affect maximum conductance.

239 **Fig. 4.** Sevoflurane binding effects on C-O equilibrium. (A) Open  
 240 probabilities of Kv1.2 for different concentrations of sevoflurane in  
 241 solution. Ligand-free and ligand-bound  $\rho_o(V)$  curves were respectively  
 242 computed from eq. [5 and 9] by taking into consideration parameters,  
 243  $V_m = -21.9mV$  and  $\Delta Q = 3.85e_s$ , for best two-state Boltzmann fit of  
 244 measured data (Liang et al., 2015). A reference experimental curve (red)  
 245 is shown for sevoflurane at 1 mM concentration. (B) Decomposition analysis  
 246 at 100mM ligand concentration. Shown is the FEP sampling overlap versus  
 247 ratio values for C-O partition functions at the individual binding sites  $j$ .  
 248 Per-site ratio values can be equal, smaller or larger than unity meaning  
 249 respectively that sevoflurane binding is not conformational dependent,  
 250 stabilizes the open structure or stabilizes the closed structure. Binding sites  
 251 located nearby flexible protein regions for which the root-mean-square  
 252 deviation (RMSD) between channel structures is larger than 4.0 Å are  
 253 highlighted in red (cf. eq. [14, 23 and 24] and Fig. S1 for details). (C)  
 254 Decomposition analysis of  $\rho_o(V)$  curves in terms of partition ratio values  
 255 showing in (B). (D) Same decomposition analysis in terms of an aggregate  
 256 per-site contribution across channels subunits. At 100mM, binding of  
 257 sevoflurane at the S4S5 linker and S4Pore interface significantly stabilizes  
 258 the open structure of the channel which contrasts the mild stabilization of  
 259 the closed structure due to ligand binding at the S6P-helix interface.

## 260 Concluding Remarks

261 Here, we carried out extensive structure-based calculations to study  
 262 conformation-dependent binding of sevoflurane to multiple saturable  
 263 sites of Kv1.2 structures  $X \equiv \{C, O\}$  - the total MD simulation time  
 264 was  $\sim 2.0 \mu s$ . Binding of sevoflurane was studied for ligand  
 265 concentrations in the range of 1mM - 100mM and saturation  
 266 conditions up to  $n_j^{max} = 2$ . Our study relied on the assumption that  
 267 molecular docking can faithfully describe ligand interactions at protein  
 268 sites. Specifically related to that assumption, we have considered the  
 269 generated ensemble of docking solutions to estimate the location of  
 270 binding sites  $\delta V_j$  and the local distribution of the ligand  $\rho_x(\mathbf{R}|n_j)$ .  
 271 The generation of false positive hits is however a well documented  
 272 drawback of docking algorithms as a result of limitations of the scoring  
 273 function in describing ligand solvation energies and protein flexibility  
 274 (Deng et al., 2015). In this regard, the combination of extensive  
 275 docking calculations against an ensemble of equilibrium receptor  
 276 structures to handle protein flexibility and FEP calculations based on  
 277 fine force-fields to accurately estimate solvation energies are critical  
 278 technical aspects of the applied methodology to minimize such  
 279 drawbacks (Deng et al., 2015). Given the same limitations of the  
 280 scoring function, it is also not guaranteed that all binding hits nor that  
 281  $\rho_x(\mathbf{R}|n_j)$  can be accurately known from docking. In this regard,  
 282 although not considered here, it might be important to integrate  
 283 docking results from different algorithms involving different scoring  
 284 functions in order to characterize the bound ensemble. Still, thanks to  
 285 the generality of the presented formulation, extension of the current investigation to sampling techniques other than docking,  
 286 including all-atom flooding-MD simulations (Arcario et al., 2017; Barber et al., 2014a; Brannigan et al., 2010; LeBard et al., 2012;  
 287 Raju et al., 2013), might also be an important refinement in that direction (*manuscript in preparation*). Despite these sampling  
 288 improvements that may eventually be obtained, it is worth mentioning that the configuration space in FEP calculations overlap  
 289 between channel structures at individual sites, meaning that sampling and binding affinities were evenly resolved between states (Fig.  
 290 S1 and 4B). Besides that, most of the identified binding sites are located nearby flexible protein regions for which the root-mean-  
 291 square deviation between channel structures is larger than 4.0 Å. Then for the purpose of quantifying any direct ligand effect on  
 292 channel energetics, the determined conformational dependence of binding sevoflurane at these gating-implicated protein regions  
 293 appears robust and likely to impact function.

294 Structural knowledge allied to solid electrophysiological data available for Kv1.2 make this channel an interesting model system  
 295 for molecular-level studies of anesthetic action thereby justifying our choice. In detail, the atomistic structures complain most of the  
 296 available experimental data characterizing closed and open conformations of the channel in the native membrane environment  
 297 (Stock et al., 2013). Previous findings support further that sevoflurane binds Kv1.2 to shift leftward its voltage-dependence and to  
 298 increase its maximum conductance in a dose-dependent manner (Liang et al., 2015). Despite a similar pattern of interactions, we  
 299 found here a clear conformational dependence for sevoflurane binding at multiple channel sites. The ligand binds preferentially the  
 300 open-conductive structure to impact the C-O energetics in a dose-dependent manner as dictated by the classical equilibrium theory  
 301 for chemical reactions embodied in eq. [9]. Front of the difficulty in conceiving and characterizing other, still more complex  
 302 molecular processes that might impact channel energetics under applied anesthetics (Cantor, 1997; Finol-Urdaneta et al., 2010; Roth  
 303 et al., 2008), the result is reassuring by showing that in principle the isolated process of sevoflurane binding to Kv1.2 accounts for  
 304 open-probability shifts as recorded in experiments. Within this scenario, the calculations reveal unexpectedly, contrasting per-site  
 305 contributions to the overall open probability of the channel. For instance, at 100mM concentration, binding of sevoflurane at the

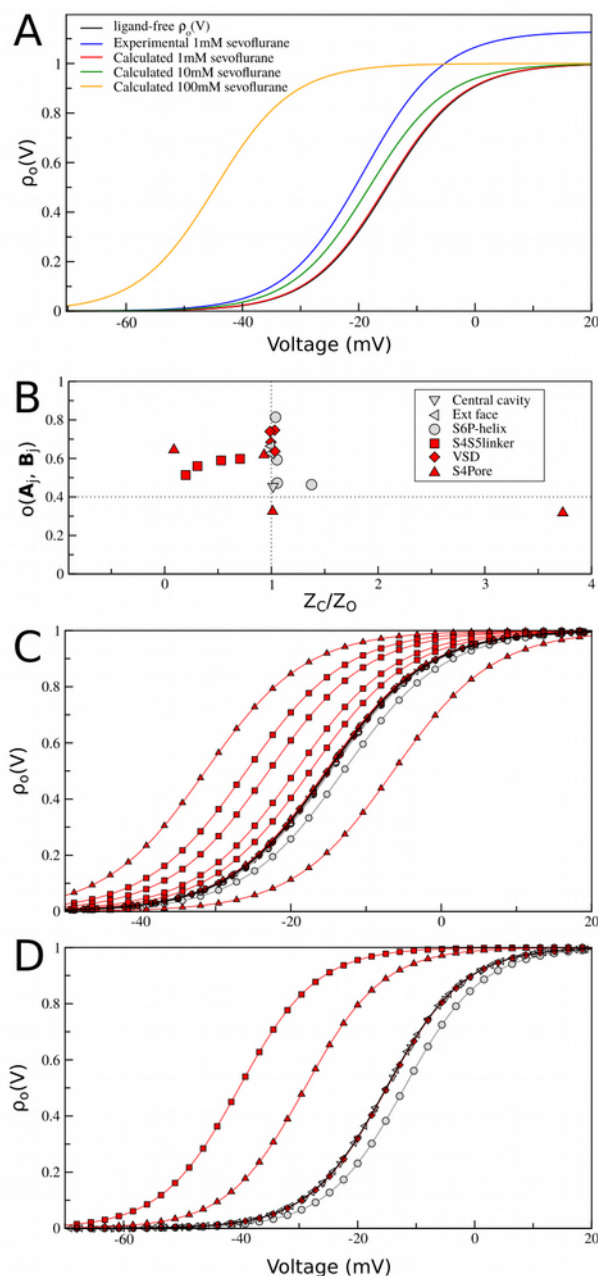

306 S4S5 linker and S4Pore interface significantly stabilizes the open structure of the channel overcoming the mild stabilization of the  
307 closed structure by ligand binding at the S6P-helix interface. By showing this non-trivial interplay of conformation-dependent modes  
308 of action involving distinct binding sites, the result is particularly insightful and should guide us to design novel site-specific  
309 mutagenesis and photolabeling experiments for further molecular characterization of anesthetic action.  
310 Although not addressing the paucity of *in vivo* experimental evidences that a binding process to a specific molecular target as  
311 presented here is related to any clinically-relevant anesthetic outcome, our study adds support to the direct-site hypothesis by linking  
312 binding free-energy and protein energetics. As such, our study treats and reveals a new layer of complexity in the anesthetic problem  
313 that brings us novel paradigms to think their molecular action and to design/interpret research accordingly. To the best of our  
314 knowledge, the main-text Fig. 3 and 4 represent in the context of structural studies, a deeper and first revealed view on the intricate  
315 mode of interactions that might take place between general anesthetics and ion channels to impact function.

316

## 317 Computational Methods

318 A procedure was designed to solve the molecular binding of sevoflurane to the open-conductive (**O**) and resting-closed (**C**) structures  
319 of Kv1.2 for saturation conditions up to  $n_j^{max}=2$ . For both channel structures, the procedure consisted of (i) an extensive production  
320 of docking solutions for the ligand-receptor interaction, (ii) clustering of docking solutions into binding sites along the receptor  
321 structure and (iii) estimation of binding affinities using the free-energy perturbation (FEP) method. First completion of steps (i)  
322 through (iii) solved the ligand channel interaction for singly-occupied binding sites. Double occupancy of the receptor sites was  
323 investigated by inputting the first generated ensemble of docked structures into another round of (i) through (iii) calculations. In  
324 detail, step (i) was accomplished by docking sevoflurane as a flexible ligand molecule against an MD-generated ensemble of  
325 membrane-equilibrated structures of the protein receptor. Docking calculations included the transmembrane domain of the channel,  
326 free from the membrane surroundings. Step (ii) provided the location of  $\delta V_j$  volumes lodging docking solutions for the ligand  
327 along the channel structures. Each of these volumes were treated as binding site regions in step (iii) calculations. FEP calculations  
328 were carried out by taking into consideration the whole ligand-channel-membrane system.

329 Following this procedure, binding constants  $K_X(n_1, \dots, n_s)$  for channel structures  $X \equiv \{C, O\}$  were solved by inputting FEP  
330 estimates into eq. [1], allowing for direct solution of state-dependent probability distributions via eq. [2]. Here, affinity constants  
331 were solved for the condition of independent binding sites. Ligand-free and ligand-bound open probability curves were respectively  
332 computed from eq. [5 and 9] by taking into consideration previously determined experimental values of  $V_m = -15.1 mV$  and  
333  $\Delta Q = 3.9 e_0$  for Kv1.2 (Liang et al., 2015). Estimates were determined for sevoflurane concentrations in the range of 1mM - 100mM  
334 (or in density units,  $6.02 \times 10^{-7} \text{\AA}^{-3}$  -  $6.02 \times 10^{-5} \text{\AA}^{-3}$ ). A detailed description of the calculations is provided bellow.

335 **Membrane Equilibrated Channel Structures.** The Kv1.2 structure in the open-conductive (**O**) state was obtained from Treptow  
336 and Tarek (Treptow and Tarek, 2006). The construct was previously acquired via molecular dynamics (MD) simulations of the  
337 published x-ray crystal structure (Long et al., 2005). The resting-closed (**C**) structure of Kv1.2 was obtained from Delemotte *et al.*  
338 (Delemotte et al., 2011). Modeling details and validation can be found in the original papers.

339 Structures **C** and **O** were embedded in the lipid bilayer for Molecular Dynamics (MD) relaxation and subsequent molecular docking  
340 of sevoflurane. Specifically, each structure featuring three  $K^+$  ions (s4s2s0) at the selectivity filter was inserted in a fully hydrated  
341 and zwitterionic all atom palmitoyloleoylphosphatidylcholine (POPC) phospholipid bilayer. After assembled, each macromolecular  
342 system was simulated over an MD simulation spanning  $\sim 20$  ns, at constant temperature (300 K) and pressure (1 atm), neutral pH,  
343 and with no applied TM electrostatic potential. The channel structures remained stable in their starting conformations throughout the  
344 simulations. The root mean-square deviation (rmsd) values for the channel structures range from 1.5 to 3.5  $\text{\AA}$ , which agrees with the  
345 structural drift quantified in previous simulation studies (Delemotte et al., 2011; Treptow and Tarek, 2006).

346 **Molecular Docking.** We used *AutoDock Vina* (Trott and Olson, 2010) to dock sevoflurane against the MD-generated ensemble of  
347 channel structures **C** and **O**. Each ensemble included 120 independent channel configurations at least. Docking solutions were  
348 resolved with an exhaustiveness parameter of 200, by searching a box volume of  $100 \times 100 \times 100 \text{\AA}^3$  containing the transmembrane  
349 domain of the protein receptor. Sevoflurane was allowed to have flexible bonds for all calculations. Clustering of docking solutions  
350 was carried out following a maximum neighborhood approach.

351 **Molecular Dynamics.** All MD simulations were carried out using the program NAMD 2.9 (Phillips et al., 2005) under Periodic  
352 Boundary Conditions. Langevin dynamics and Langevin piston methods were applied to keep the temperature (300 K) and the  
353 pressure (1 atm) of the system fixed. The equations of motion were integrated using a multiple time-step algorithm (Izaguirre et al.,  
354 1999). Short- and long-range forces were calculated every 1 and 2 time-steps respectively, with a time step of 2.0 fs. Chemical bonds  
355 between hydrogen and heavy atoms were constrained to their equilibrium value. Long-range electrostatic forces were taken into  
356 account using the Particle Mesh Ewald (PME) approach (Darden et al., 1993). The CHARMM36 force field (Huang and MacKerell,  
357 2013) was applied and water molecules were described by the TIP3P model (Jorgensen et al., 1983). All the protein charged amino  
358 acids were simulated in their full-ionized state (pH=7.0). All MD simulations, including FEP and voltage-driven simulations (see  
359 next), were performed on local HPC facility at LBTC amounting to a total run time of  $\sim 2.0 \mu s$ .

360 **Free-Energy Perturbation (FEP).** Eq. [1] was simplified here for the condition of ligand interactions to multiple independent sites -  
361 a condition that appears to be fulfilled at the channel structures featuring sparse binding sites for sevoflurane. Within this scenario,  
362 binding constants for structures  $X \equiv \{C, O\}$  were factorized as the product of independent equilibrium constants

$$K_X(n_1, \dots, n_s) = K_X(n_1, 0_2, \dots, 0_s) \times \dots \times K_X(0_1, \dots, 0_{s-1}, n_s) \quad (10)$$

363 where,



$$K_X(n_1, 0_2, \dots, 0_s) = \frac{1}{n_1!} \left[ \prod_{i=1}^{n_1} \left( \frac{2\pi}{\beta k_i} \right)^{\frac{3}{2}} \right] e^{-\beta [W_X^*(n_1) - n_1 \bar{\mu}]} \quad (11)$$

$$\dots$$

$$K_X(0_1, \dots, 0_{s-1}, n_s) = \frac{1}{n_s!} \left[ \prod_{i=1}^{n_s} \left( \frac{2\pi}{\beta k_i} \right)^{\frac{3}{2}} \right] e^{-\beta [W_X^*(n_s) - n_s \bar{\mu}]}$$

364 denote respectively the binding constant of  $n_j$  ligands to each of the  $j$  sites at structure  $X$ .

365 Accordingly, the *excess* chemical potential  $\bar{\mu}$  associated with coupling of the ligand from gas phase to bulk water and  $W_X^*(n_j)$   
 366 associated with coupling of  $n_j$  ligands from gas phase to site  $j$  under restraints were quantified via FEP. Because computation of  
 367  $\bar{\mu}$  does not depend upon the choice of concentration, so long as the same thermodynamic state is used for the solution and gas  
 368 phases, we estimated the *excess* potential by considering one sevoflurane molecule embedded into a water box of  $60 \times 60 \times 60 \text{ \AA}^3$ .

369  $W_X^*(n_j)$  was computed by taking into considering the whole ligand-channel-membrane system.

370 All FEP calculations were performed in NAMD 2.9 (Phillips et al., 2005) by considering the Charmm-based parameters for  
 371 sevoflurane as devised by Barber *et al.* (Barber et al., 2014b). Starting from channel-membrane equilibrated systems containing  
 372 bound sevoflurane as resolved from docking, forward transformation were carried out by varying the coupling parameter in steps of  
 373 0.01. Each transformation then involved a total of 100 windows, each spanning over 31800 steps of simulation. For the purpose of  
 374 improving statistics, free-energy estimates and associated statistical errors were determined using the simple overlap sampling (SOS)  
 375 formula (Lu et al., 2004) based on at least two independent FEP runs.

376 Specifically for ligand-protein calculations, the free-energy change  $W_X^*(1_j)$  for singly-occupied sites  $j$  was computed as a FEP  
 377 process that involves ligand coupling to a vacant site. Differently, for doubly-occupied sites,  $W_X^*(2_j)$  was computed as a two-step  
 378 FEP process involving ligand coupling to a vacant site  $W_X^*(1_j)$  followed by binding of a second ligand at the preoccupied site  
 379  $W_X^*(2_j|1_j)$ . Because  $W_X^*(2_j)$  is a state function, the stepwise approach is equivalent to a single-step process involving simultaneous  
 380 coupling of two ligands to the protein site that is,  $W_X^*(2_j) = W_X^*(1_j) + W_X^*(2_j|1_j)$ . The colvars module (Fiorin et al., 2013) in NAMD  
 381 2.9 was used to apply the harmonic restraint potentials when computing these quantities.

382 The value of  $W_X^*(n_j)$  depends on the parameters of the restraint potential adopted in the FEP calculation *ie.*, the reference positions  
 383 of the ligands in the bound state  $\{\mathbf{R}_X^*(1_j), \dots, \mathbf{R}_X^*(n_j)\}$  and the magnitude of force constants  $\{k_X(1_j), \dots, k_X(n_j)\}$ . By minimizing  
 384 the contribution of the restraint potential to the binding free-energy  $W_X^*(n_j)$ , Roux and coworkers (Roux et al., 1996) devised  
 385 optimum choices for the parameters

$$\{\mathbf{R}_X^*(1_j) = \langle \mathbf{R}_X(1_j) \rangle, \dots, \mathbf{R}_X^*(n_j) = \langle \mathbf{R}_X(n_j) \rangle\} \quad (12)$$

386 and

$$\{k_X(1_j) = \frac{3\beta^{-1}}{\langle [\delta \mathbf{R}_X(1_j)]^2 \rangle}, \dots, k_X(n_j) = \frac{3\beta^{-1}}{\langle [\delta \mathbf{R}_X(n_j)]^2 \rangle}\} \quad (13)$$

387 in which,  $\langle \mathbf{R}_X(1_j) \rangle, \dots, \langle \mathbf{R}_X(n_j) \rangle$  and  $\langle [\delta \mathbf{R}_X(1_j)]^2 \rangle, \dots, \langle [\delta \mathbf{R}_X(n_j)]^2 \rangle$  are respectively the equilibrium average positions for each of  
 388 the  $n_j$  bound ligands at site  $j$  and their corresponding mean-square fluctuations when interacting to structure  $X$ . Here, these  
 389 parameters were estimated from the space of docking solutions and the resulting force constants, in the range of 0.03 to 1.35  
 390 kcal/mol/ $\text{\AA}^2$ , were considered for computations of the bound state.

391 The equilibrium binding constant (eq. [10 and 11]) and following results are derived in the limit of a homogeneous diluted reservoir  
 392 occupied by ligands at constant density  $\bar{\rho}$  and excess chemical potential  $\bar{\mu}$ . Given that, we treated the system reservoir as a  
 393 homogeneous aqueous solution despite its intrinsic inhomogeneity provided by the solvated lipid bilayer. An excess chemical  
 394 potential of  $-0.1 \text{ kcal.mol}^{-1}$  was estimated here as the reservoir potential for sevoflurane in bulk water.

395 **Sampling Overlap.** Here, a per-site measure of sampling overlap  $o(\mathbf{A}_j, \mathbf{B}_j)$  between FEP configurations in structures  $\mathbf{C}$  and  $\mathbf{O}$

$$o(\mathbf{A}_j, \mathbf{B}_j) = 1 - \frac{\sqrt{\text{tr}((\mathbf{A}_j^{1/2} - \mathbf{B}_j^{1/2})^2)}}{\sqrt{\text{tr} \mathbf{A}_j + \text{tr} \mathbf{B}_j}}, \quad (14)$$

396 was determined (Hess, 2002) from the square root of the covariance matrices  $\mathbf{A}_j$  and  $\mathbf{B}_j$  associated respectively to  $\mathbf{C}$  and  $\mathbf{O}$   
 397 samples at site  $j$ . Specifically,  $\mathbf{A}_j$  and  $\mathbf{B}_j$  were computed as symmetric  $3 \times 3$  covariance matrices for centroid positions  $\mathbf{R}_j$  of  
 398 the ligand at site  $j$

$$\mathbf{X}_j = \langle (\mathbf{R}_j - \langle \mathbf{R}_j \rangle) \cdot (\mathbf{R}_j - \langle \mathbf{R}_j \rangle)^T \rangle$$

399 and their square roots

$$\mathbf{X}_j^{1/2} = \mathbf{R} \text{diag}(\lambda_1^{1/2}, \lambda_2^{1/2}, \lambda_3^{1/2}) \mathbf{R}^T$$

400 were solved from the column major eigenvectors  $\{\mathbf{R}_1, \mathbf{R}_2, \mathbf{R}_3\}$  of the rotation matrix  $\mathbf{R}$  and the associated eigenvalues  
 401  $\{\lambda_1, \lambda_2, \lambda_3\}$ . Note that overlap is expectedly 1 for identical samplings and 0 for orthogonal configuration spaces.

402 **Absolute Binding Free Energy and Ensemble Averages.** An absolute binding free-energy  $\Delta G_X^o(n_1, \dots, n_s)$  (Gilson et al., 1997)  
 403 associated with state  $O_X^*(n_1, \dots, n_s)$  can be defined as

$$\Delta G_X^o(n_1, \dots, n_s) = -\beta^{-1} \ln [K_X(n_1, \dots, n_s) \times (C^o)^n] \quad (15)$$

404 where it is understood that this refers to the free energy of binding  $n$  ligands to the protein structure  $X \equiv \{\mathbf{C}, \mathbf{O}\}$  from a reference  
 405 standard reservoir concentration  $C^o = 1M$  or in units of number density  $C^o = (1,660 \text{ \AA}^3)^{-1}$ . Still, the relevance of eq. [2] is clear

$$\langle A_X \rangle = \sum_{n_1, \dots, n_s} \langle A_X \rangle_{(n_1, \dots, n_s)} \rho_X(n_1', \dots, n_s') \quad (16)$$

406 as the ensemble average of any thermodynamic property of the system  $A_X(n_1', \dots, n_s')$  for state  $O_X^*(n_1', \dots, n_s')$  can be known from  
407 eq. [16].

408 **Position-Dependent Probability Densities.** As demonstrated in reference (Stock et al., 2017), state-dependent probabilities  
409  $\rho_X(n_1, \dots, n_s)$  for channel structures  $X \equiv \{C, O\}$  can be mapped into the probability density  $\rho_X(\mathbf{R})$  of any given ligand  $i$   
410 occupy position  $\mathbf{R}$  in the system (regardless the position of the remaining  $N-1$  ligands). Given our original consideration that the  
411 reservoir is a homogeneous volume occupied by ligands with position-independent density  $\bar{\rho}$ , the probability  $\rho_X(\mathbf{R})$  simplifies to

$$\rho_X(\mathbf{R}) = \begin{cases} \rho_X^j(\mathbf{R}), \forall \mathbf{R} \in \delta V_j \\ \bar{\rho}, \text{reservoir} \end{cases} \quad (17)$$

412 for every protein site  $j=1, \dots, s$ . The determination of  $\rho_X(\mathbf{R})$  thus reduces in practice to knowledge of the per-site density  $\rho_X^j(\mathbf{R})$

$$\rho_X^j(\mathbf{R}) = \sum_{n_j=0}^{n_j^{\max}} \rho_X(n_j) \times \rho_X(\mathbf{R}|n_j) \quad (18)$$

413 where,  $\rho_X(\mathbf{R}|n_j)$  is the local density at site  $j$  when occupied exactly by  $n_j$  molecules and  $\rho_X(n_j)$  is the probability for this  
414 occupancy state. In eq. [18],  $\rho_X(\mathbf{R}|n_j)$  describes the local equilibrium density of the ligand, conditional to a specific number of  
415 bound molecules that satisfies  $\int_{\delta V_j} d\mathbf{R} \rho_X(\mathbf{R}|n_j) = n_j$ . In contrast,

$$\rho_X(n_j) = \sum_{n_1, \dots, n_s} \delta_{n_j, n_j} \rho_X(n_1', \dots, n_s') \quad (19)$$

416 denotes the marginal probability of site  $j$  to be occupied by  $n_j$  ligands regardless the occupancy of the other sites.

417 Eq. [18] establishes a formal relation between space-dependent and state-dependent densities of the system. At a fine level, this  
418 relation involves the set of equilibrium constants  $K_X(n_1, \dots, n_s)$  satisfying  $\rho_X(n_j)$ . From eq. [18], spatial projections of  $\rho_X(\mathbf{R})$   
419 along the transmembrane  $z$  direction of the system can be achieved as

$$\rho_X(z) = \bar{\rho} \times A(z) + \sum_{j=1}^s \rho_X^j(z) \quad (20)$$

420 where,  $A(z) = \Delta x \Delta y$  is the total area of the membrane-aqueous region along the Cartesian  $x$  and  $y$  directions.

421 **Coarse-Graining Over States.** Consider any macrostate  $O_X^*(n)$  of the system mapping an ensemble of accessible states  
422  $O_X^*(n_1, \dots, n_s)$  in which  $n$  ligands bind the receptor regardless their specific distributions over the binding sites. Because  $O_X^*(n)$   
423 is degenerate, the probability density of the macrostate

$$\rho_X(n) = \sum_{n_1, \dots, n_s} \delta_{n, n} \rho_X(n_1', \dots, n_s') \quad (21)$$

424 can be determined by coarse-graining over the receptor states  $O_X^*(n_1, \dots, n_s)$  featuring exactly  $n = n_1 + \dots + n_s$  bound ligands. Here, the  
425 Kronecker delta function  $\delta_{n, n}$  ensures summation over states accessible to  $O_X^*(n)$  only.

426 **Binding of Potassium and Sevoflurane at the Main-Pore of Kv1.2.** FEP calculations to quantify the binding free-energy of  
427 sevoflurane against a preoccupied central cavity of Kv1.2 with bound potassium was computed as described in the Free-Energy  
428 Perturbation (FEP) section. Specifically, the free-energy change  $W_o^*(2_j)$  for double occupancy of the central-cavity by potassium  
429 and sevoflurane was computed as a two-step FEP process involving coupling of the ion to the central cavity  $W_o^*(1_j)$  followed by  
430 binding of the anesthetic at the preoccupied cavity  $W_o^*(2_j|1_j)$  that is,  $W_o^*(2_j) = W_o^*(1_j) + W_o^*(2_j|1_j)$ . Absolute binding free energies  
431  $\Delta G_o^o(0_1, \dots, 1_j, \dots, 0_s)$  and  $\Delta G_o^o(0_1, \dots, 2_j, \dots, 0_s)$  were then computed from the respective binding constants  $K_o(0_1, \dots, 1_j, \dots, 0_s)$   
432 and  $K_o(0_1, \dots, 2_j, \dots, 0_s)$  according to eq. [11 and 15]. An in-water *excess* potential of  $-69.52 \text{ kcal.mol}^{-1}$  was estimated for potassium.  
433 Specifically for  $K^+$ , a total binding free-energy was obtained by summing up its absolute binding free energy with its charge ( $q$ )  
434 excess free energy ( $q\phi V$ ) under an applied external voltage  $V$  (Dong et al., 2013; Souza et al., 2014). The voltage coupling  $\phi$   
435 was determined in the form of the “electrical distance”

$$\delta_\epsilon = \frac{\partial}{\partial V} \Phi(V) \Big|_{V=0} \quad (22)$$

436 where,  $\Phi(V)$  is the local-electrostatic potential of the ion at the central cavity of the open channel. In practice, we applied the  
437 charge imbalance protocol (see next) to solve  $\delta_\epsilon$  from two independent 2ns-long simulations at voltages  $V=0 \text{ mV}$  and  
438  $V=600 \text{ mV}$ . For both runs,  $\Phi(V)$  was estimated from the electrostatic potential map of the system and subsequently applied into  
439 eq. [22] to solve  $\delta_\epsilon$  for  $\delta V=600 \text{ mV}$ .

440 To investigate the conduction properties of Kv1.2 with bound sevoflurane at the main pore, the open channel structure was simulated  
441 under depolarized-membrane conditions using a charge-imbalance protocol (Delemotte et al., 2008).

442 **Partition Function Decomposition.** In the limit of  $s$  independent sites, binding constants can be factorized as the product of  
443 independent equilibrium constants eq. [11] then ensuring the associated partition function to be factorized in terms

$$Z_X(n_1, \dots, n_s) = Z_X(n_1, 0_2, \dots, 0_s) \times \dots \times Z_X(0_1, \dots, 0_{s-1}, n_s) \quad (23)$$

444 of per-site contributions. Eq. [23] is useful to estimate the per-site contributions impacting the opening probability of the channel as  
445 defined in eq. [9]. For any given site  $j$ , ratio values

$$\frac{Z_c(0_1, \dots, n_j, \dots, 0_s)}{Z_o(0_1, \dots, n_j, \dots, 0_s)} \begin{cases} = 1 \\ > 1 \\ < 1 \end{cases} \quad (24)$$

446 mean respectively that ligand binding is not conformational dependent, stabilizes the open structure or stabilizes the closed structure.

447

#### 448 Acknowledgements

449 The research was supported in part by the Brazilian Agencies CNPq, CAPES and FAPDF under Grants 305008/2015-3,  
450 23038.010052/2013-95 and 193.001.202/2016. WT thanks CNPq for doctoral fellowship to LS (140845/2014-3).

451

#### 452 Competing interests statement

453 The authors declare there are no financial or non-financial competing interests.

454

#### 455 References

- Arcario, M.J., Mayne, C.G., Tajkhorshid, E., 2017. A membrane-embedded pathway delivers general anesthetics to two interacting binding sites in the *Gloeobacter violaceus* ion channel. *J. Biol. Chem.* 292, 9480–9492. <https://doi.org/10.1074/jbc.M117.780197>
- Barber, A.F., Carnevale, V., Klein, M.L., Eckenhoff, R.G., Covarrubias, M., 2014a. Modulation of a voltage-gated Na<sup>+</sup> channel by sevoflurane involves multiple sites and distinct mechanisms. *Proc. Natl. Acad. Sci.* 111, 6726–6731. <https://doi.org/10.1073/pnas.1405768111>
- Barber, A.F., Carnevale, V., Klein, M.L., Eckenhoff, R.G., Covarrubias, M., 2014b. Modulation of a voltage-gated Na<sup>+</sup> channel by sevoflurane involves multiple sites and distinct mechanisms. *Proc. Natl. Acad. Sci.* 111, 6726–6731. <https://doi.org/10.1073/pnas.1405768111>
- Barber, A.F., Carnevale, V., Raju, S.G., Amaral, C., Treptow, W., Klein, M.L., 2012. Hinge-bending motions in the pore domain of a bacterial voltage-gated sodium channel. *Biochim. Biophys. Acta* 1818, 2120–2125. <https://doi.org/10.1016/j.bbame.2012.05.002>
- Barber, A.F., Liang, Q., Amaral, C., Treptow, W., Covarrubias, M., 2011. Molecular mapping of general anesthetic sites in a voltage-gated ion channel. *Biophys. J.* 101, 1613–1622. <https://doi.org/10.1016/j.bpj.2011.08.026>
- Barber, A.F., Liang, Q., Covarrubias, M., 2012. Novel activation of voltage-gated K<sup>+</sup> channels by sevoflurane. *J. Biol. Chem.* 287, 40425–40432. <https://doi.org/10.1074/jbc.M112.405787>
- Brannigan, G., LeBard, D.N., Hémin, J., Eckenhoff, R.G., Klein, M.L., 2010. Multiple binding sites for the general anesthetic isoflurane identified in the nicotinic acetylcholine receptor transmembrane domain. *Proc. Natl. Acad. Sci.* 107, 14122–14127. <https://doi.org/10.1073/pnas.1008534107>
- Bu, W., Liang, Q., Zhi, L., Maciunas, L., Loll, P.J., Eckenhoff, R.G., Covarrubias, M., 2017. Sites and Functional Consequence of Alkylphenol Anesthetic Binding to Kv1.2 Channels. *Mol. Neurobiol.* 1–11. <https://doi.org/10.1007/s12035-017-0437-2>
- Cantor, R.S., 1997. The Lateral Pressure Profile in Membranes: A Physical Mechanism of General Anesthesia. *Biochemistry (Mosc.)* 36, 2339–2344. <https://doi.org/10.1021/bi9627323>
- Chipot, C., Pohorille, A. (Eds.), 2007. *Free Energy Calculations: Theory and Applications in Chemistry and Biology*. Springer.
- Covarrubias, M., Barber, A.F., Carnevale, V., Treptow, W., Eckenhoff, R.G., 2015. Mechanistic Insights into the Modulation of Voltage-Gated Ion Channels by Inhalational Anesthetics. *Biophys. J.* 109, 2003–2011. <https://doi.org/10.1016/j.bpj.2015.09.032>
- Darden, T., York, D., Pedersen, L., 1993. Particle mesh Ewald: An N·log(N) method for Ewald sums in large systems. *J. Chem. Phys.* 98, 10089–10092. <https://doi.org/10.1063/1.464397>
- Delemotte, L., Dehez, F., Treptow, W., Tarek, M., 2008. Modeling membranes under a transmembrane potential. *J Chem Phys B* 112, 5547–5550.
- Delemotte, L., Tarek, M., Klein, M.L., Amaral, C., Treptow, W., 2011. Intermediate states of the Kv1.2 voltage sensor from atomistic molecular dynamics simulations. *Proc. Natl. Acad. Sci. U. S. A.* 108, 6109–6114. <https://doi.org/10.1073/pnas.1102724108>
- Deng, N., Forli, S., He, P., Perryman, A., Wickstrom, L., Vijayan, R.S.K., Tiefenbrunn, T., Stout, D., Gallicchio, E., Olson, A.J., Levy, R.M., 2015. Distinguishing Binders from False Positives by Free Energy Calculations: Fragment Screening Against the Flap Site of HIV Protease. *J. Phys. Chem. B* 119, 976–988. <https://doi.org/10.1021/jp506376z>
- Dong, H., Fiorin, G., Carnevale, V., Treptow, W., Klein, M.L., 2013. Pore waters regulate ion permeation in a calcium release-activated calcium channel. *Proc. Natl. Acad. Sci.* 201316969. <https://doi.org/10.1073/pnas.1316969110>
- Finol-Urdaneta, R.K., McArthur, J.R., Juranka, P.F., French, R.J., Morris, C.E., 2010. Modulation of KvAP Unitary Conductance and Gating by 1-Alkanols and Other Surface Active Agents. *Biophys. J.* 98, 762–772. <https://doi.org/10.1016/j.bpj.2009.10.053>
- Fiorin, G., Klein, M.L., Hémin, J., 2013. Using collective variables to drive molecular dynamics simulations. *Mol. Phys.* 111, 3345–3362. <https://doi.org/10.1080/00268976.2013.813594>
- Franks, N.P., 2008. General anaesthesia: from molecular targets to neuronal pathways of sleep and arousal. *Nat. Rev. Neurosci.* 9, 370–386.
- Franks, N.P., Honoré, E., 2004. The TREK K<sub>2</sub>P channels and their role in general anaesthesia and neuroprotection. *Trends Pharmacol. Sci.* 25, 601–608. <https://doi.org/10.1016/j.tips.2004.09.003>
- Gilson, M.K., Given, J.A., Bush, B.L., McCammon, J.A., 1997. The statistical-thermodynamic basis for computation of binding affinities: a critical review. *Biophys. J.* 72, 1047–1069.
- Hess, B., 2002. Convergence of sampling in protein simulations. *Phys. Rev. E* 65, 031910. <https://doi.org/10.1103/PhysRevE.65.031910>
- Heurteaux, C., Guy, N., Laigle, C., Blondeau, N., Duprat, F., Mazzuca, M., Lang-Lazdunski, L., Widmann, C., Zanzouri, M., Romey, G., Lazdunski,

- M., 2004. TREK-1, a K<sup>+</sup> channel involved in neuroprotection and general anesthesia. *EMBO J* 23, 2684–2695.
- Huang, J., MacKerell, A.D., 2013. CHARMM36 all-atom additive protein force field: Validation based on comparison to NMR data. *J. Comput. Chem.* 34, 2135–2145. <https://doi.org/10.1002/jcc.23354>
- Izaguirre, J.A., Reich, S., Skeel, R.D., 1999. Longer time steps for molecular dynamics. *J. Chem. Phys.* 110, 9853–9864. <https://doi.org/10.1063/1.478995>
- Jayakar, S.S., Dailey, W.P., Eckenhoff, R.G., Cohen, J.B., 2013. Identification of Propofol Binding Sites in a Nicotinic Acetylcholine Receptor with a Photoreactive Propofol Analog. *J. Biol. Chem.* 288, 6178–6189. <https://doi.org/10.1074/jbc.M112.435909>
- Jorgensen, W.L., Chandrasekhar, J., Madura, J.D., Impey, R.W., Klein, M.L., 1983. Comparison of simple potential functions for simulating liquid water. *J. Chem. Phys.* 79, 926–935. <https://doi.org/10.1063/1.445869>
- Kinde, M.N., Bondarenko, V., Granata, D., Bu, W., Grasty, K.C., Loll, P.J., Carnevale, V., Klein, M.L., Eckenhoff, R.G., Tang, P., Xu, Y., 2016. Fluorine-19 NMR and computational quantification of isoflurane binding to the voltage-gated sodium channel NaChBac. *Proc. Natl. Acad. Sci.* 113, 13762–13767. <https://doi.org/10.1073/pnas.1609939113>
- LeBard, D.N., Hémin, J., Eckenhoff, R.G., Klein, M.L., Brannigan, G., 2012. General Anesthetics Predicted to Block the GLIC Pore with Micromolar Affinity. *PLoS Comput. Biol.* 8. <https://doi.org/10.1371/journal.pcbi.1002532>
- Liang, Q., Anderson, W.D., Jones, S.T., Souza, C.S., Hosoume, J.M., Treptow, W., Covarrubias, M., 2015. Positive Allosteric Modulation of Kv Channels by Sevoflurane: Insights into the Structural Basis of Inhaled Anesthetic Action. *PLoS ONE* 10, e0143363. <https://doi.org/10.1371/journal.pone.0143363>
- Long, S.B., Campbell, E.B., MacKinnon, R., 2005. Crystal structure of a mammalian voltage-dependent Shaker family K<sup>+</sup> channel. *Science* 309, 897–903.
- Lu, N., Kofke, D.A., Woolf, T.B., 2004. Improving the efficiency and reliability of free energy perturbation calculations using overlap sampling methods. *J. Comput. Chem.* 25, 28–40. <https://doi.org/10.1002/jcc.10369>
- Nury, H., Van Renterghem, C., Weng, Y., Tran, A., Baaden, M., Dufresne, V., Changeux, J.-P., Sonner, J.M., Delarue, M., Corringer, P.-J., 2011. X-ray structures of general anaesthetics bound to a pentameric ligand-gated ion channel. *Nature* 469, 428–431. <https://doi.org/10.1038/nature09647>
- Phillips, J.C., Braun, R., Wang, W., Gumbart, J., Tajkhorshid, E., Villa, E., Chipot, C., Skeel, R.D., Kalé, L., Schulten, K., 2005. Scalable molecular dynamics with NAMD. *J. Comput. Chem.* 26, 1781–1802. <https://doi.org/10.1002/jcc.20289>
- Raju, S.G., Barber, A.F., LeBard, D.N., Klein, M.L., Carnevale, V., 2013. Exploring Volatile General Anesthetic Binding to a Closed Membrane-Bound Bacterial Voltage-Gated Sodium Channel via Computation. *PLoS Comput Biol* 9, e1003090. <https://doi.org/10.1371/journal.pcbi.1003090>
- Roth, R., Gillespie, D., Nonner, W., Eisenberg, R.E., 2008. Bubbles, Gating, and Anesthetics in Ion Channels. *Biophys. J.* 94, 4282–4298. <https://doi.org/10.1529/biophysj.107.120493>
- Roux, B., 2008. The membrane potential and its representation by a constant electric field in computer simulations. *Biophys. J.* 95, 4205–4216. <https://doi.org/10.1529/biophysj.108.136499>
- Roux, B., Nina, M., Pomès, R., Smith, J.C., 1996. Thermodynamic stability of water molecules in the bacteriorhodopsin proton channel: a molecular dynamics free energy perturbation study. *Biophys. J.* 71, 670–681. [https://doi.org/10.1016/S0006-3495\(96\)79267-6](https://doi.org/10.1016/S0006-3495(96)79267-6)
- Souza, C.S., Amaral, C., Treptow, W., 2014. Electric fingerprint of voltage sensor domains. *Proc. Natl. Acad. Sci.* 111, 17510–17515. <https://doi.org/10.1073/pnas.1413971111>
- Stock, L., Hosoume, J., Treptow, W., 2017. Concentration-Dependent Binding of Small Ligands to Multiple Saturable Sites in Membrane Proteins. *Sci. Rep.* 7, 5734. <https://doi.org/10.1038/s41598-017-05896-8>
- Stock, L., Souza, C., Treptow, W., 2013. Structural Basis for Activation of Voltage-Gated Cation Channels. *Biochemistry (Mosc.)* 52, 1501–1513. <https://doi.org/10.1021/bi3013017>
- Treptow, W., Tarek, M., 2006. Environment of the gating charges in the Kv1.2 Shaker potassium channel. *Biophys. J.* 90, L64–66. <https://doi.org/10.1529/biophysj.106.080754>
- Trott, O., Olson, A.J., 2010. AutoDock Vina: Improving the speed and accuracy of docking with a new scoring function, efficient optimization, and multithreading. *J. Comput. Chem.* 31, 455–461. <https://doi.org/10.1002/jcc.21334>
- Woll, K.A., Peng, W., Liang, Q., Zhi, L., Jacobs, J.A., Maciunas, L., Bhanu, N., Garcia, B.A., Covarrubias, M., Loll, P.J., Dailey, W.P., Eckenhoff, R.G., 2017. Photoaffinity Ligand for the Inhalational Anesthetic Sevoflurane Allows Mechanistic Insight into Potassium Channel Modulation. *ACS Chem. Biol.* 12, 1353–1362. <https://doi.org/10.1021/acscchembio.7b00222>
